# Supplementary material
Source: Springer Nature journal article supplement (https://www.springermedizin.de/resource/supplementary/12879_2011_1893_MOESM2_ESM.pdf/9443994)

Incremental Costs

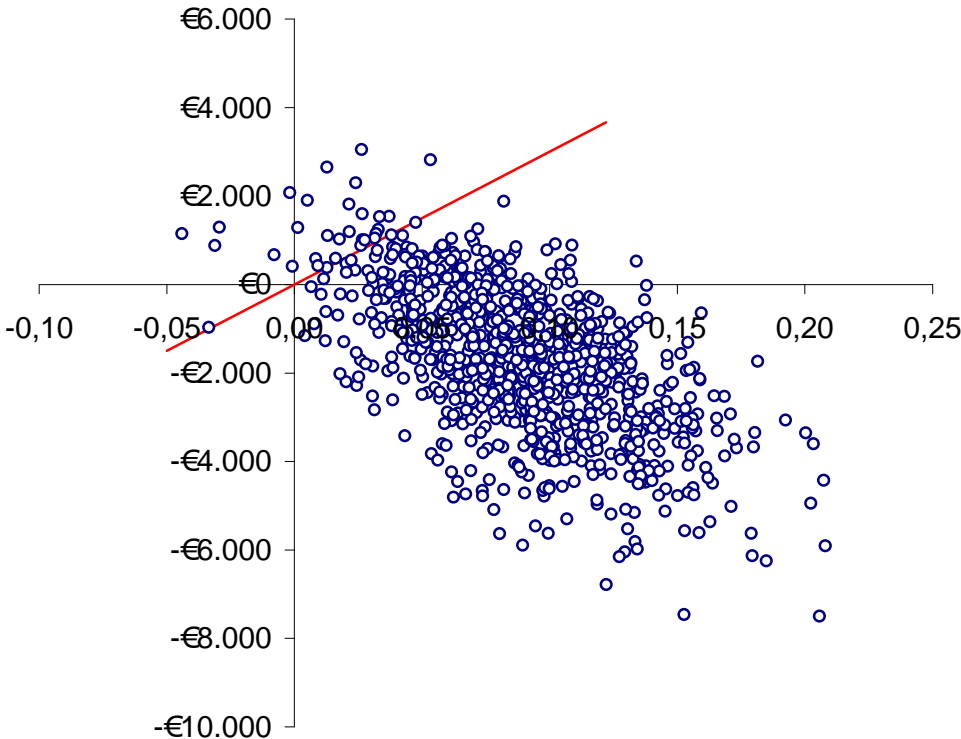

Incremental Life Years

- ICERs
- €30000/LYS Threshold

Supplement: MOESM2 [file 9443994]
